# Supplementary material for: Au25(SG)18 as a fluorescent iodide sensor
Source: Royal Society of Chemistry journal article supplement (doi:10.1039/c2nr30169e), 2012-01-01
Supplement: c2nr30169e.pdf [file c2nr30169e.pdf]

## Supporting information

### Au<sub>25</sub>(SG)<sub>18</sub> as fluorescent iodide nanosensor

Man Wang,<sup>a</sup> Zhikun Wu,<sup>\*a</sup> Jiao Yang,<sup>a</sup> Guozhong Wang,<sup>a</sup> Hongzhi Wang,<sup>b</sup>  
Weiping Cai,<sup>\*a</sup>

<sup>a</sup>Key Laboratory of Materials Physics, Anhui Key Laboratory of Nanomaterials and Nanostructures, Institute of Solid State Physics, Chinese Academy of Sciences, Hefei, 230031, China. E-mail: zkwu@issp.ac.cn; wpcai@issp.ac.cn

<sup>b</sup>Center of Medical Physics and Technology, Hefei Institutes of Physical Science, Chinese Academy of Sciences, Hefei 230031

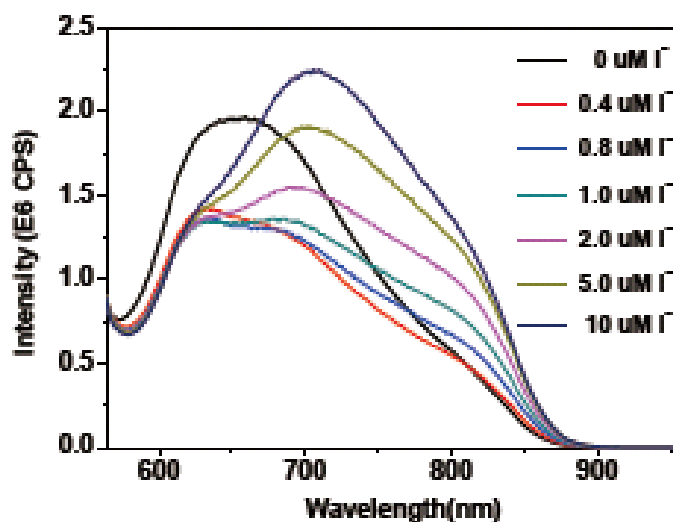

Figure S1. Fluorescence spectra of Au<sub>25</sub>(SG)<sub>18</sub> (~1.6 μM in H<sub>2</sub>O) with successive titration of iodide.

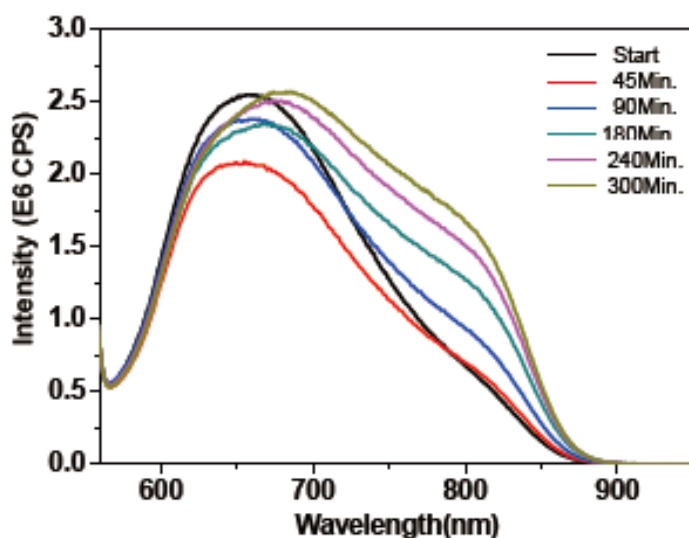

Figure S2. Time-dependent fluorescence of Au<sub>25</sub>(SG)<sub>18</sub> after the addition of 400nM NaI.
